# Supplementary material
Source: PubMed Central journal article supplement (PMC9877103)
Supplement: NIHMS1839092-supplement-Supplementary_tables.pdf [file NIHMS1839092-supplement-Supplementary_tables.pdf]

**Supplementary Table 1.** Concussion reporting expectation (CR-E) item level responses by group

|                                                   | Timepoint 1                 |                        | Timepoint 2                 |                        |
|---------------------------------------------------|-----------------------------|------------------------|-----------------------------|------------------------|
|                                                   | Intervention Group<br>n=184 | Control Group<br>n=155 | Intervention Group<br>n=160 | Control Group<br>n=147 |
| 1. ...even if the team was counting on me to play |                             |                        |                             |                        |
| 0 Never                                           | 7 (4.5%)                    | 13 (9.9%)              | 4 (2.8%)                    | 13 (10.3%)             |
| 1 Rarely                                          | 24 (15.6%)                  | 13 (9.9%)              | 16 (11.3%)                  | 20 (15.9%)             |
| 2 Sometimes                                       | 34 (22.1%)                  | 24 (18.3%)             | 32 (22.7%)                  | 19 (15.1%)             |
| 3 Often                                           | 40 (26.0%)                  | 33 (25.2%)             | 30 (21.3%)                  | 32 (25.4%)             |
| 4 Always                                          | 49 (31.8%)                  | 48 (36.6%)             | 59 (41.8%)                  | 42 (33.3%)             |
| 2. ...even if I really wanted to keep playing     |                             |                        |                             |                        |
| 0 Never                                           | 7 (4.7%)                    | 12 (9.2%)              | 3 (2.1%)                    | 11 (8.8%)              |
| 1 Rarely                                          | 23 (15.3%)                  | 22 (16.8%)             | 18 (12.9%)                  | 20 (16.0%)             |
| 2 Sometimes                                       | 34 (22.7%)                  | 25 (19.1%)             | 38 (27.1%)                  | 26 (20.8%)             |
| 3 Often                                           | 38 (25.3%)                  | 25 (19.1%)             | 26 (18.6%)                  | 27 (21.6%)             |
| 4 Always                                          | 48 (32.0%)                  | 47 (35.9%)             | 55 (39.3%)                  | 41 (32.8%)             |
| 3. ...even if it was a close game                 |                             |                        |                             |                        |
| 0 Never                                           | 15 (9.7%)                   | 18 (13.7%)             | 8 (5.8%)                    | 15 (11.9%)             |
| 1 Rarely                                          | 24 (15.6%)                  | 22 (16.8%)             | 18 (13.0%)                  | 21 (16.7%)             |
| 2 Sometimes                                       | 29 (18.8%)                  | 18 (13.7%)             | 26 (18.8%)                  | 19 (15.1%)             |
| 3 Often                                           | 33 (21.4%)                  | 30 (22.9%)             | 27 (19.6%)                  | 32 (25.4%)             |
| 4 Always                                          | 53 (34.4%)                  | 43 (32.8%)             | 59 (42.8%)                  | 39 (31.0%)             |
| 4. ...even if my team will be down a player       |                             |                        |                             |                        |
| 0 Never                                           | 15 (9.8%)                   | 22 (16.8%)             | 12 (8.6%)                   | 19 (15.1%)             |
| 1 Rarely                                          | 28 (18.3%)                  | 26 (19.8%)             | 16 (11.5%)                  | 19 (15.1%)             |
| 2 Sometimes                                       | 33 (21.6%)                  | 19 (14.5%)             | 28 (20.1%)                  | 22 (17.5%)             |
| 3 Often                                           | 32 (20.9%)                  | 24 (18.3%)             | 27 (19.4%)                  | 22 (17.5%)             |
| 4 Always                                          | 45 (29.4%)                  | 40 (30.5%)             | 56 (40.3%)                  | 44 (34.9%)             |

**Supplementary Table 2.** Rates of reporting behavior among those reporting a blow to the head during the prior season followed by concussion symptoms.

|                                | Intervention Group<br>n (%) | Control<br>Group<br>n (%) | p-value |
|--------------------------------|-----------------------------|---------------------------|---------|
| Experienced a blow to the head | 32 (100)                    | 28 (100)                  |         |
| Did NOT keep playing (=safe)   | 11 (34.4)                   | 6 (21.4)                  | 0.33    |

**Supplementary Table 3.** Adjusted relative risk (RR) of expected likelihood of engaging in high risk and low risk injurious play (IP-E), in the intervention group compared to the control group, at the end of the season, overall and for key subgroups of interest.

|                                      | Proportion reporting "likely" to engage in potentially injurious play (95% CI) |                  | RR (95% CI)      |
|--------------------------------------|--------------------------------------------------------------------------------|------------------|------------------|
|                                      | Intervention                                                                   | Control          |                  |
| <b>High-risk behavior:</b>           |                                                                                |                  |                  |
| <b>Overall Study Population:</b>     | 0.38 (0.29-0.48)                                                               | 0.41 (0.32-0.51) | 0.93 (0.61-1.41) |
| <b>By Sport:</b>                     |                                                                                |                  |                  |
| Soccer                               | 0.30 (0.17-0.42)                                                               | 0.31 (0.19-0.43) | 0.96 (0.50-1.84) |
| Football (which is male only)        | 0.43 (0.38-0.47)                                                               | 0.55 (0.43-0.67) | 0.77 (0.58-1.04) |
| <b>By Gender:</b>                    |                                                                                |                  |                  |
| Female (which is soccer only)        | 0.21 (0.06-0.37)                                                               | 0.31 (0.10-0.52) | 0.69 (0.28-1.68) |
| Male                                 | 0.41 (0.34-0.48)                                                               | 0.52 (0.41-0.63) | 0.78 (0.55-1.11) |
| <b>By Age:</b>                       |                                                                                |                  |                  |
| 9-10 years (which is soccer only)    | 0.37 (0.18-0.56)                                                               | 0.26 (0.15-0.37) | 1.40 (0.71-2.77) |
| 11-12 years                          | 0.37 (0.29-0.44)                                                               | 0.42 (0.31-0.53) | 0.86 (0.59-1.26) |
| 13-14 years (which is football only) | 0.46 (0.30-0.62)                                                               | 0.56 (0.40-0.71) | 0.83 (0.53-1.28) |
| <b>Lower-risk behavior:</b>          |                                                                                |                  |                  |
| Overall Study Population:            | 0.62 (0.49-0.76)                                                               | 0.54 (0.43-0.65) | 1.15 (0.79-1.68) |
| <b>By Sport:</b>                     |                                                                                |                  |                  |
| Soccer                               | 0.52 (0.36-0.68)                                                               | 0.36 (0.17-0.55) | 1.44 (0.73-2.82) |
| Football (which is male only)        | 0.71 (0.69-0.73)                                                               | 0.72 (0.67-0.78) | 0.98 (0.88-1.09) |
| <b>By Gender:</b>                    |                                                                                |                  |                  |
| Female (which is soccer only)        | 0.41 (0.28-0.53)                                                               | 0.51 (0.29-0.72) | 0.80 (0.44-1.45) |
| Male                                 | 0.67 (0.49-0.84)                                                               | 0.64 (0.46-0.82) | 1.05 (0.63-1.76) |
| <b>By Age:</b>                       |                                                                                |                  |                  |
| 9-10 years (which is soccer only)    | 0.52 (0.36-0.67)                                                               | 0.27 (0.00-0.53) | 1.94 (0.62-6.02) |
| 11-12 years                          | 0.59 (0.43-0.75)                                                               | 0.65 (0.50-0.80) | 0.91 (0.58-1.43) |
| 13-14 years (which is football only) | 0.77 (0.63-0.91)                                                               | 0.63 (0.55-0.72) | 1.22 (0.97-1.53) |

Adjusted for youth age, team gender, baseline response, and coach gender and age
